# Supplementary material for: The European Ruminants during the “Microbunodon Event” (MP28, Latest Oligocene): Impact of Climate Changes and Faunal Event on the Ruminant Evolution
Source: PubMed Central journal article supplement (PMC4334963; doi:10.1371/journal.pone.0116830), 2015-02-18
Supplement: pone.0116830.s001.pdf [file pone.0116830.s001.pdf]

Annexe1 *Bacitharium lavocati* tooth size

|                 | p1 |     | p2  |     | p3  |     | p4  |     | m1  |     | m2  |     | m3   |     | p2-4 | m1-3 |
|-----------------|----|-----|-----|-----|-----|-----|-----|-----|-----|-----|-----|-----|------|-----|------|------|
| BSPG 1952II4800 |    |     | 7,1 |     | 7,9 |     |     |     |     |     |     |     |      |     |      |      |
| BSPG 1952II4801 |    |     |     |     |     |     |     |     | 8,3 | 5,5 |     |     |      |     |      |      |
| BSPG 1952II4802 |    |     |     |     |     |     | 7,9 | 4   | 7,2 | 5,1 | 8,2 | 5,5 |      | 6   |      |      |
| BSPG 1952II4810 |    |     |     |     | 8,5 | 3,6 |     |     |     |     |     |     |      |     |      |      |
| BSPG 1952II4812 |    |     |     |     |     |     |     |     |     |     | 8,6 | 5,8 | 13   | 5,7 |      |      |
| BSPG 1952II4813 |    |     |     |     | 7,9 | 3,3 | 8,7 | 4,2 |     |     |     |     |      |     |      |      |
| BSPG 1952II4814 |    |     | 5,5 | 2,6 |     |     |     |     |     |     |     |     |      |     |      |      |
| BSPG 1952II4816 |    |     |     |     |     |     |     |     |     |     |     |     | 14,2 | 6,5 |      | 33   |
| BSPG 1952II4817 |    |     |     |     |     |     |     |     | 8,6 | 5,5 | 9,7 | 6,5 | 15,2 | 6,3 |      | 35,2 |
| BSPG 1952II4819 |    |     |     |     |     |     |     |     |     |     | 8,9 | 6,2 | 12,7 | 6,2 |      |      |
| BSPG 1952II4822 |    |     |     |     |     |     |     |     | 7,2 | 6,1 | 8,5 |     |      |     |      |      |
| BSPG 1952II4823 |    |     |     |     | 9,1 | 3,5 | 9,7 | 5,3 |     |     |     |     |      |     |      |      |
| BSPG 1952II4824 |    |     |     |     | 8,1 | 3,8 | 9,3 | 4,1 |     |     |     |     |      |     |      |      |
| BSPG 1952II4825 |    |     |     |     |     |     |     |     |     |     | 8,6 |     | 11,5 |     |      |      |
| BSPG 1952II4826 |    |     |     |     | 7,3 | 3   | 7,1 | 3,7 | 7,3 | 5,1 |     |     |      |     |      |      |
| BSPG 1952II4833 |    |     |     |     |     |     |     |     | 8   | 5,2 | 8,6 | 6,9 |      |     |      |      |
| BSPG 1952II4834 |    |     |     |     |     |     |     |     | 8,4 | 5,6 | 9,5 | 6,2 |      |     |      |      |
| BSPG 1952II4835 |    |     |     |     |     |     |     |     | 7,4 | 5,1 |     |     |      |     |      |      |
| BSPG 1952II4837 |    |     |     |     |     |     |     |     |     |     |     |     | 14,9 | 7   |      |      |
| BSPG 1952II4839 |    |     |     |     |     |     | 8,2 | 4,2 | 7,8 |     |     |     |      |     |      |      |
| BSPG 1952II4840 |    |     |     |     |     |     |     |     | 7,4 | 5,2 |     |     |      |     |      |      |
| BSPG 1952II4843 |    |     |     |     |     |     |     |     |     |     | 9,1 | 6,4 |      |     |      |      |
| BSPG 1952II4846 |    |     |     |     |     |     |     |     | 7,7 | 5,6 | 8,9 | 6,5 |      |     |      |      |
| BSPG 1952II4848 |    |     |     |     |     |     |     |     |     |     |     |     |      | 7,8 |      |      |
| BSPG 1952II4849 |    |     |     |     |     |     |     |     | 8,5 | 6,4 | 9,5 | 7   |      |     |      |      |
| BSPG 1952II4850 |    |     |     |     |     |     |     |     |     |     |     |     | 15,6 |     |      |      |
| BSPG 1952II4852 |    |     | 7,5 |     | 8,6 |     | 9   |     |     |     |     | 6,8 | 15,4 | 6,8 |      | 36,8 |
| BSPG 1952II4853 |    |     |     |     |     |     |     |     |     |     |     |     | 14,7 | 6,7 |      |      |
| BSPG 1952II4861 |    |     |     |     |     |     |     |     |     |     | 9,8 | 6,9 |      |     |      |      |
| BSPG 1952II4866 |    |     |     |     |     |     |     |     |     |     |     |     | 14,3 | 6,5 |      |      |
| BSPG 1952II4869 |    |     |     |     |     |     | 7,1 | 3,7 | 7,5 |     |     |     |      |     |      |      |
| BSPG 1952II4871 |    |     |     |     |     |     |     |     |     |     | 9,4 | 6,8 |      |     |      |      |
| BSPG 1952II4875 |    |     |     |     |     |     |     |     |     |     | 9,7 | 6,7 |      |     |      |      |
| BSPG 1952II4876 |    |     |     |     |     |     |     |     |     |     |     |     | 15   | 7,2 |      |      |
| BSPG 1952II4877 |    |     |     |     |     |     |     |     |     |     |     |     | 13,8 | 6,4 |      |      |
| BSPG 1952II4879 |    |     |     |     |     |     |     |     |     |     |     |     | 14   | 6,2 |      |      |
| BSPG 1952II4881 |    |     | 6,4 |     | 7,8 |     | 8,4 | 4,3 | 7,9 | 5,4 | 9,1 | 6,2 |      |     | 22,8 |      |
| BSPG 1952II4886 |    |     |     |     |     |     |     |     |     |     | 5,8 |     |      |     |      |      |
| BSPG 1952II4887 |    |     |     |     | 7,5 | 3,8 |     |     |     |     |     |     |      |     |      |      |
| BSPG 1952II4893 |    |     |     |     |     |     |     |     |     |     |     |     |      |     | 22,8 |      |
| BSPG 1952II4895 |    |     |     |     |     |     |     |     | 7,3 | 5,3 | 8,6 | 6,1 | 13,9 | 6,7 |      | 31,2 |
| BSPG 1952II4905 |    |     |     |     |     |     |     |     |     |     | 9,2 | 6,5 | 13,9 | 6,5 |      | 30,6 |
| BSPG 1952II4906 |    |     |     |     | 5,9 |     | 7,6 |     |     |     |     |     |      |     |      |      |
| BSPG 1952II4907 |    |     |     |     |     | 3,3 |     |     |     |     | 8,6 |     |      |     |      |      |
| BSPG 1952II4908 |    |     | 7,1 | 2,8 | 8,4 | 3,6 | 9,3 | 4,5 | 8,5 | 6,3 |     |     |      |     | 25   | 29,6 |
| BSPG 1952II4910 |    |     |     |     |     |     |     |     | 8,9 | 6,5 | 10  | 7,3 | 14,5 | 7,2 |      | 36,7 |
| BSPG 1952II4936 | 4  | 3,5 |     |     |     |     |     |     |     |     |     |     |      |     |      |      |
| BSPG 1952II4937 |    |     |     |     |     |     |     |     | 8,6 | 5,8 |     |     |      |     |      |      |
| BSPG 1952II4938 |    |     |     |     |     |     |     |     | 8,7 | 6   |     |     |      |     |      |      |
| BSPG 1952II4939 |    |     |     |     |     |     |     |     | 7,8 | 5,3 |     |     |      |     |      |      |
| BSPG 1952II4940 |    |     |     |     |     |     |     |     |     |     | 8,8 | 6,2 |      |     |      |      |

Annexe1 *Bacitharium lavocati* tooth size

|                 | P2  |     | P3  |     | P4  |     | M1  |      | M2   |      | M3   |      | M1-3 |
|-----------------|-----|-----|-----|-----|-----|-----|-----|------|------|------|------|------|------|
| BSPG 1952II4827 |     |     | 8,6 | 6,5 | 5,2 | 9   |     |      |      |      |      |      |      |
| BSPG 1952II4831 |     |     |     |     |     |     | 8,6 | 10,4 |      |      |      |      |      |
| BSPG 1952II4832 |     |     |     |     |     |     |     | 10,2 |      |      |      |      |      |
| BSPG 1952II4836 |     |     |     |     |     |     |     |      | 9,5  |      |      |      |      |
| BSPG 1952II4856 |     |     |     |     |     |     |     |      |      | 9,5  | 10,6 |      |      |
| BSPG 1952II4859 |     |     |     |     |     |     | 8,5 | 9,5  |      |      |      |      |      |
| BSPG 1952II4860 |     |     |     |     |     |     |     |      | 9,3  | 11,1 |      |      |      |
| BSPG 1952II4869 | 7,9 | 3,6 |     |     |     |     |     |      |      |      |      |      |      |
| BSPG 1952II4874 |     |     |     |     |     |     |     |      |      |      | 10,5 | 12   |      |
| BSPG 1952II4882 |     |     | 8,5 |     |     |     |     |      |      |      |      |      |      |
| BSPG 1952II4902 |     |     | 8,9 | 7,5 | 7   | 9,8 |     |      | 10,1 | 11,2 | 10,6 | 11,9 | 28,5 |
| BSPG 1952II4902 |     |     | 9,6 | 8   | 7   | 9,6 | 8,8 | 10,5 |      |      |      |      |      |
| BSPG 1952II4904 |     |     |     |     |     |     |     |      |      |      | 10,2 | 12   | 26,7 |
| BSPG 1952II4916 |     |     |     |     |     |     | 9,1 | 10,2 |      |      |      |      |      |
| BSPG 1952II4918 |     |     |     |     | 6,6 | 8   | 7,4 | 9,6  |      |      |      |      |      |
| BSPG 1952II4919 |     |     |     |     |     |     |     |      |      |      | 10   | 10,8 |      |
| BSPG 1952II4922 |     |     |     |     |     |     |     |      | 9    |      | 9,9  | 11,9 | 25,9 |
| BSPG 1952II4923 |     |     |     |     | 7,1 | 8,5 |     |      | 9,4  | 10,8 | 9,3  | 11,3 | 25,7 |
| BSPG 1952II4925 |     |     |     |     |     |     | 6,8 | 9,2  | 9    | 10,2 | 10,5 | 12   | 26   |
| BSPG 1952II4926 |     |     |     |     |     |     | 7,7 | 10,2 | 9,2  | 11,8 | 10,3 | 12   | 26,8 |
| BSPG 1952II4928 |     |     |     |     |     |     |     |      | 8,5  | 10,4 |      |      |      |
| BSPG 1952II4929 |     |     |     |     |     |     |     |      |      |      | 10,2 | 12,6 |      |
| BSPG 1952II4930 |     |     |     |     |     |     | 7,8 | 10,4 |      |      |      |      |      |
| BSPG 1952II4931 |     |     |     |     |     |     |     |      |      |      | 10,1 | 10,3 |      |

|                 | d3  |     | d4   |     |
|-----------------|-----|-----|------|-----|
| BSPG 1952II4828 |     |     | 10   | 5,2 |
| BSPG 1952II4829 |     |     |      | 4,7 |
| BSPG 1952II4830 |     |     | 11,3 | 4,8 |
| BSPG 1952II4833 | 7,5 | 3,4 | 10,1 | 4,7 |
| BSPG 1952II4834 |     |     |      | 4,9 |
| BSPG 1952II4841 | 7,2 |     | 9,5  | 4,2 |
| BSPG 1952II4862 | 8,1 |     |      |     |
| BSPG 1952II4863 | 7,4 | 3   |      |     |
| BSPG 1952II4864 | 8,2 | 3,2 |      |     |
| BSPG 1952II4889 |     |     |      | 4,6 |
| BSPG 1952II4890 | 8   | 3   |      |     |
| BSPG 1952II4895 |     |     |      | 4,5 |

|                 | D3  |     | D4  |     |
|-----------------|-----|-----|-----|-----|
| BSPG 1952II4805 | 9,5 | 7,1 | 8,4 | 8,9 |
| BSPG 1952II4806 | 9,6 | 6,7 | 7,9 | 8,6 |
| BSPG 1952II4807 | 9,2 | 6,6 |     |     |
| BSPG 1952II4808 | 8,9 | 6   |     |     |
| BSPG 1952II4809 | 9,7 | 6,7 |     |     |
| BSPG 1952II4857 | 9,5 | 7   | 8,2 | 8,7 |
| BSPG 1952II4916 | 9,9 | 7,2 |     |     |

Annexe1 *Bachitherium lavocati* tooth size

|                     | p1 |     | p2   |     | p3  |     | p4  |     | m1  |     | m2  |     | m3   |     | p2-4 | m1-3 |
|---------------------|----|-----|------|-----|-----|-----|-----|-----|-----|-----|-----|-----|------|-----|------|------|
| number of specimens | 1  | 1   | 5    | 2   | 11  | 8   | 11  | 9   | 20  | 19  | 20  | 18  | 16   | 16  | 3    | 7    |
| mean                | 4  | 3,5 | 6,72 | 2,7 | 7,9 | 3,5 | 8,4 | 4,2 | 7,9 | 5,6 | 9,1 | 6,5 | 14,2 | 6,6 | 23,5 | 33,3 |
| maximum             |    |     | 7,5  | 2,8 | 9,1 | 3,8 | 9,7 | 5,3 | 8,9 | 6,5 | 10  | 7,3 | 15,6 | 7,8 | 25   | 36,8 |
| minimum             |    |     | 5,5  | 2,6 | 5,9 | 3   | 7,1 | 3,7 | 7,2 | 5,1 | 8,2 | 5,5 | 11,5 | 5,7 | 22,8 | 29,6 |
| Standard Deviation  |    |     | 0,8  | 0,1 | 0,8 | 0,3 | 0,9 | 0,5 | 0,6 | 0,5 | 0,5 | 0,4 | 1,1  | 0,5 | 1,3  | 2,9  |

|                     | P2  |     | P3  |     | P4   |     | M1  |      | M2   |      | M3   |      | M1-3 |
|---------------------|-----|-----|-----|-----|------|-----|-----|------|------|------|------|------|------|
| number of specimens | 1   | 1   | 4   | 3   | 5    | 5   | 8   | 8    | 7    | 7    | 11   | 11   | 6    |
| mean                | 7,9 | 3,6 | 8,9 | 7,3 | 6,58 | 8,9 | 8,1 | 10,0 | 9,2  | 10,7 | 10,1 | 11,6 | 26,6 |
| maximum             |     |     | 9,6 | 8   | 7,1  | 9,8 | 9,1 | 10,5 | 10,1 | 11,8 | 10,6 | 12,6 | 28,5 |
| minimum             |     |     | 8,5 | 6,5 | 5,2  | 8   | 6,8 | 9,2  | 8,5  | 9,5  | 9,3  | 10,3 | 25,7 |
| Standard Deviation  |     |     | 0,5 | 0,8 | 0,8  | 0,7 | 0,8 | 0,5  | 0,5  | 0,7  | 0,4  | 0,7  | 1,0  |

|                     | d3  |     | d4   |     | D3  |     | D4  |     |
|---------------------|-----|-----|------|-----|-----|-----|-----|-----|
| number of specimens | 6   | 4   | 4    | 8   | 7   | 7   | 3   | 3   |
| mean                | 7,7 | 3,2 | 10,2 | 4,7 | 8,2 | 5,6 | 6,9 | 6,1 |
| maximum             | 8,2 | 3,4 | 11,3 | 5,2 | 9,9 | 7,2 | 8,4 | 8,9 |
| minimum             | 7,2 | 3   | 9,5  | 4,2 | 8,9 | 6   | 7,9 | 8,6 |
| Standard Deviation  | 0,4 | 0,2 | 0,8  | 0,3 | 0,3 | 0,4 | 0,2 | 0,1 |
