# Supplementary material for: The European Ruminants during the “Microbunodon Event” (MP28, Latest Oligocene): Impact of Climate Changes and Faunal Event on the Ruminant Evolution
Source: PubMed Central journal article supplement (PMC4334963; doi:10.1371/journal.pone.0116830), 2015-02-18
Supplement: pone.0116830.s002.pdf [file pone.0116830.s002.pdf]

Annexe2 “*Amphitragulus*” *quercyi* tooth size

|                 | p2  |  | p3  |     | p4  |     | m1  |     | m2  |     | m3   |     | p2-4 | m1-3 |
|-----------------|-----|--|-----|-----|-----|-----|-----|-----|-----|-----|------|-----|------|------|
| BSPG 1952II4811 |     |  |     |     |     |     |     |     | 7,9 | 5,9 |      |     |      |      |
| BSPG 1952II4820 |     |  |     |     | 7,4 |     | 7,9 |     |     |     |      |     |      |      |
| BSPG 1952II4821 |     |  |     |     |     |     | 7,9 |     | 8,2 |     | 12   |     |      |      |
| BSPG 1952II4844 |     |  |     |     |     |     |     |     |     |     | 12,3 |     |      |      |
| BSPG 1952II4851 |     |  |     |     |     |     | 8   |     | 7,6 |     | 11,6 |     | 26   | 26   |
| BSPG 1952II4854 |     |  |     |     |     |     |     | 5,2 |     |     |      |     |      |      |
| BSPG 1952II4858 |     |  |     |     |     |     | 8   | 5,2 |     |     |      |     |      |      |
| BSPG 1952II4865 |     |  |     |     |     |     |     |     | 7,8 | 6,9 | 11,5 | 5,8 | 26,9 | 26,9 |
| BSPG 1952II4872 |     |  |     |     |     |     |     |     |     | 5,8 |      |     |      |      |
| BSPG 1952II4873 |     |  |     |     |     |     |     |     |     |     | 11,7 | 6   |      |      |
| BSPG 1952II4878 |     |  |     |     |     |     |     |     |     |     | 10,2 | 5,3 |      |      |
| BSPG 1952II4884 |     |  |     |     | 7,3 | 4   |     |     |     |     |      |     |      |      |
| BSPG 1952II4885 |     |  |     |     | 7,2 | 3,9 |     |     | 8,2 | 6   |      |     |      |      |
| BSPG 1952II4894 | 5,3 |  | 6,6 |     | 7   |     |     | 8,3 |     |     |      |     |      |      |
| BSPG 1952II4909 |     |  |     |     |     |     |     |     | 7,6 |     | 10,8 |     |      |      |
| BSPG 1952II4914 | 6,2 |  | 7   |     | 7,2 |     | 7,5 |     | 8,5 |     | 11,3 |     | 27,5 | 27,5 |
| BSPG 1952II4917 |     |  |     |     |     | 3,6 |     |     |     |     |      |     |      |      |
| BSPG 1952II4927 |     |  |     |     |     |     |     |     | 7,3 | 5,8 | 12,2 | 5,9 | 27,2 | 27,2 |
| BSPG 1952II4941 |     |  |     |     | 6,7 | 3,7 |     |     |     |     |      |     |      |      |
| BSPG 1952II4943 |     |  |     |     |     |     | 9   |     |     |     |      |     |      |      |
| BSPG 1952II4946 |     |  |     |     |     |     | 7,8 | 4,9 | 8,2 | 5,5 |      | 6,4 | 29   | 29   |
| BSPG 1952II4950 |     |  |     |     | 7,5 |     | 8,5 | 5,7 |     |     |      |     |      |      |
| BSPG 1952II4952 |     |  | 6,5 | 3,1 | 7,3 | 4   |     |     | 8,5 | 5   | 12,8 | 5,4 |      |      |

|                 | P2  |     | P3  |     | P4  |     | M1  |     | M2  |      | M3  |      | M1-3 |
|-----------------|-----|-----|-----|-----|-----|-----|-----|-----|-----|------|-----|------|------|
| BSPG 1952II4803 |     |     | 7,2 | 6,2 | 4,8 | 7,1 | 7,4 | 8,8 |     |      |     |      |      |
| BSPG 1952II4804 |     |     |     |     |     |     | 8,8 |     |     |      |     |      |      |
| BSPG 1952II4845 |     |     |     |     |     |     | 7,4 |     |     |      | 8,3 |      |      |
| BSPG 1952II4847 |     |     |     |     |     |     | 8,5 |     |     |      |     |      |      |
| BSPG 1952II4891 |     |     |     |     |     |     |     |     |     |      | 7,8 | 7,9  |      |
| BSPG 1952II4892 |     |     |     |     |     |     |     |     | 7,9 | 8,7  |     |      |      |
| BSPG 1952II4911 |     |     |     |     | 6,5 | 7,2 | 7,8 | 9,2 | 8,4 | 9,5  |     |      |      |
| BSPG 1952II4912 | 6,4 | 4,5 | 6,7 | 6   | 5,3 | 7,4 | 7,5 | 8,3 |     |      |     |      |      |
| BSPG 1952II4920 |     |     |     |     |     |     |     |     | 8,5 | 10,1 | 8   | 9,4  |      |
| BSPG 1952II4921 |     |     |     |     |     |     | 6,7 | 9   | 8,4 | 9,5  | 8   | 8,8  | 23,5 |
| BSPG 1952II4924 |     |     |     |     |     |     |     |     | 7,9 | 9,5  |     |      |      |
| BSPG 1952II4932 |     |     |     |     |     |     |     |     |     |      | 9,1 | 10,9 |      |
| BSPG 1952II4933 |     |     |     |     |     |     |     |     |     |      | 7,8 | 9,9  |      |
| BSPG 1952II4944 |     |     |     |     |     |     |     |     | 9,3 | 9,5  | 8,3 | 9,5  |      |
| BSPG 1952II4945 |     |     |     |     |     |     | 8,3 | 9,7 | 9,2 | 9,5  |     |      |      |
| BSPG 1952II4947 |     |     |     |     |     |     | 6,5 | 8,2 | 8,1 | 8,5  |     |      | 23,5 |
| BSPG 1952II4948 |     |     | 7,6 |     |     |     |     |     |     |      |     |      |      |
| BSPG 1952II4949 |     |     |     |     |     |     |     |     | 7,8 |      | 8,5 |      |      |
| BSPG 1952II4951 |     |     |     |     |     |     |     |     | 8   | 9,4  |     |      |      |

|                 | d3  |     | d4   |     |
|-----------------|-----|-----|------|-----|
| BSPG 1952II4867 |     |     |      | 4,7 |
| BSPG 1952II4942 | 6,9 | 2,5 |      |     |
| BSPG 1952II4943 | 7,3 |     | 10,3 |     |

|                 | D3  |     | D4  |     |
|-----------------|-----|-----|-----|-----|
| BSPG 1952II4804 | 8,1 | 6,3 | 7,1 | 7,4 |
| BSPG 1952II4847 | 7,5 | 7,2 | 6,5 | 7,5 |
| BSPG 1952II4945 |     |     | 5,9 | 7,6 |

Annexe2 “*Amphitragulus*” *quercyi* tooth size

|                     | p2  |   | p3  |     | p4  |     | m1  |      | m2  |     | m3   |     | m1-3 |
|---------------------|-----|---|-----|-----|-----|-----|-----|------|-----|-----|------|-----|------|
| number of specimens | 2   | 0 | 3   | 1   | 8   | 5   | 9   | 4    | 10  | 7   | 10   | 6   | 5    |
| mean                | 5,7 |   | 6,7 | 3,1 | 7,2 | 3,8 | 8,1 | 5,25 | 8,0 | 5,8 | 11,6 | 5,8 | 27,3 |
| maximum             | 6,2 |   | 7   | 3,1 | 7,5 | 4   | 9   | 5,7  | 8,5 | 6,9 | 12,8 | 6,4 | 29   |
| minimum             | 5,3 |   | 6,5 | 3,1 | 6,7 | 3,6 | 7,5 | 4,9  | 7,3 | 5   | 10,2 | 5,3 | 26   |
| Standard Deviation  | 0,6 |   | 0,3 |     | 0,2 | 0,2 | 0,4 | 0,3  | 0,4 | 0,6 | 0,7  | 0,4 | 1,1  |

|                     | P2  |     | P3  |     | P4  |     | M1  |     | M2  |      | M3  |      | M1-3 |
|---------------------|-----|-----|-----|-----|-----|-----|-----|-----|-----|------|-----|------|------|
| number of specimens | 1   | 1   | 3   | 2   | 3   | 3   | 9   | 6   | 10  | 9    | 8   | 6    | 2    |
| mean                | 6,4 | 4,5 | 7,2 | 6,1 | 5,5 | 7,2 | 7,6 | 8,9 | 8,3 | 9,3  | 8,2 | 9,4  | 23,5 |
| maximum             |     |     | 7,6 | 6,2 | 6,5 | 7,4 | 8,8 | 9,7 | 9,3 | 10,1 | 9,1 | 10,9 | 23,5 |
| minimum             |     |     | 6,7 | 6   | 4,8 | 7,1 | 6,5 | 8,2 | 7,8 | 8,5  | 7,8 | 7,9  | 23,5 |
| Standard Deviation  |     |     | 0,4 | 0,1 | 0,9 | 0,1 | 0,8 | 0,6 | 0,5 | 0,8  | 0,4 | 1,0  | 0    |

|                     | d3  |     | d4   |     | D3  |      | D4  |     |
|---------------------|-----|-----|------|-----|-----|------|-----|-----|
| number of specimens | 2   | 1   | 1    | 1   | 2   | 2    | 3   | 3   |
| mean                | 7,1 | 2,5 | 10,3 | 4,7 | 7,8 | 6,75 | 6,5 | 7,5 |
| maximum             | 7,3 |     |      |     | 8,1 | 7,2  | 7,1 | 7,6 |
| minimum             | 6,9 |     |      |     | 7,5 | 6,3  | 5,9 | 7,4 |
| Standard Deviation  | 0,3 |     |      |     | 0,4 | 0,6  | 0,6 | 0,1 |
